# Supplementary material for: Comparative Analysis of Volatile Flavor Compounds in Seven Mustard Pastes via HS-SPME–GC–MS
Source: MDPI journal article supplement (doi:10.3390/molecules28145482), 2023-07-18
Supplement: s1 [file s1]

**Table S1.** The relative concentration of volatile compounds in seven MP samples.

| Compounds                              | Relative cconcentration (µg/g) |               |                |                |                |               |               | RI/RI* <sup>b</sup> | Qualitative method <sup>d</sup> |
|----------------------------------------|--------------------------------|---------------|----------------|----------------|----------------|---------------|---------------|---------------------|---------------------------------|
|                                        | MP 1                           | MP 2          | MP 3           | MP 4           | MP 5           | MP 6          | MP 7          |                     |                                 |
| <b>Esters (9)</b>                      |                                |               |                |                |                |               |               |                     |                                 |
| Allyl isocyanate                       | 2.63±0.19                      | 1.86±0.08     | 5.43±1.02      | - <sup>a</sup> | 6.84±0.47      | 5.15±0.62     | 3.83±0.30     | 972/N <sup>c</sup>  | MS                              |
| sec-Butylisothiocyanate-               | 3.29±0.75                      | 4.38±1.19     | -              | 8.31±1.58      | 3.27±0.35      | -             | -             | 1289/1287           | MS, RI, S                       |
| Allyl isothiocyanate                   | 2561.01±82.90                  | 2496.43±77.48 | 3405.20±102.51 | 2540.38±42.03  | 6495.20±131.46 | 4734.59±67.05 | 3895.28±42.33 | 1363/1361           | MS, RI, S                       |
| Allyl thiocyanate                      | 520.50±38.56                   | 499.57±27.09  | 714.63±51.27   | 524.18±49.98   | 1562.81±78.40  | 1092.93±71.03 | 867.37±58.63  | 1447/1440           | MS, RI                          |
| 3-Butenyl isothiocyanate               | 5.42±1.04                      | 5.39±0.97     | -              | 303.38±25.90   | -              | 6.36±1.42     | -             | 1451/1453           | MS, RI                          |
| Diglycolmonoethylether acetate         | 2.00±0.21                      | 2.34±0.03     | 6.10±0.10      | -              | -              | -             | -             | 1684/N              | MS                              |
| 3-(Methylthio)propyl isothiocyanate    | -                              | 1.62±0.32     | -              | 2.55±0.17      | -              | -             | -             | 1938/1979           | MS, S                           |
| Benzyl isothiocyanate                  | 1.96±0.05                      | 2.20±0.04     | 1.22±0.00      | 2.70±0.31      | 1.60±0.08      | 1.31±0.09     | -             | 2097/2107           | MS, RI, S                       |
| Phenylethyl isothiocyanate             | 98.42±5.46                     | 186.67±29.30  | 86.61±15.21    | 227.92±40.10   | 52.46±9.66     | 71.78±12.35   | 8.26±1.28     | 2227/2234           | MS, RI, S                       |
| <b>Sulfur-containing compounds (3)</b> |                                |               |                |                |                |               |               |                     |                                 |
| Allyl mercaptan                        | 1.47±0.01                      | 3.33±0.04     | 2.35±0.55      | -              | -              | -             | -             | 886/887             | MS, RI, S                       |
| Diallyl sulfide                        | -                              | 1.09±0.20     | 1.36±0.36      | -              | 8.75±2.01      | 6.00±0.18     | 1.92±0.02     | 1148/1148           | MS, RI, S                       |
| Diallyl disulphide                     | -                              | -             | -              | -              | 2.34±0.15      | -             | -             | 1477/1475           | MS, RI, S                       |
| <b>Nitriles (2)</b>                    |                                |               |                |                |                |               |               |                     |                                 |
| 3-Butenenitrile                        | 90.13±14.45                    | 18.5±3.22     | 87.72±10.13    | -              | 4.68±0.99      | 3.16±0.25     | 52.78±7.66    | 1176/1186           | MS, RI                          |
| Benzenepropanenitrile                  | 86.58±17.30                    | 11.17±3.21    | 21.91±2.05     | 11.59±1.60     | 2.23±0.07      | 1.43±0.01     | 22.10±2.19    | 2035/2041           | MS, RI                          |
| <b>Ketones (3)</b>                     |                                |               |                |                |                |               |               |                     |                                 |
| α-Turmerone                            | 4.47±1.51                      | -             | -              | -              | -              | -             | -             | 2183/2245           | MS                              |
| β-Turmerone                            | 2.76±0.03                      | -             | -              | -              | -              | -             | -             | 2250/N              | MS                              |
| ar-Turmerone                           | 3.49±0.10                      | -             | -              | -              | -              | -             | -             | 2262/N              | MS                              |
| <b>Alkenes (3)</b>                     |                                |               |                |                |                |               |               |                     |                                 |

|                                  |            |             |              |            |              |            |            |           |           |
|----------------------------------|------------|-------------|--------------|------------|--------------|------------|------------|-----------|-----------|
| $\alpha$ -Zingiberene            | 3.79±0.52  | -           | -            | -          | 289.04±36.17 | -          | -          | 1718/1715 | MS, RI    |
| (-)- $\beta$ -Sesquiphellandrene | 4.20±0.96  | -           | -            | -          | -            | -          | -          | 1765/1765 | MS, RI    |
| Curcumene                        | 2.33±0.12  | -           | -            | -          | -            | -          | -          | 1769/1768 | MS, RI    |
| <b>Others (7)</b>                |            |             |              |            |              |            |            |           |           |
| Carbon disulfide                 | 28.22±4.32 | 143.4±11.60 | 136.91±18.94 | 16.37±0.92 | 184.56±24.22 | 88.93±8.40 | 39.42±5.14 | 730/733   | MS, RI, S |
| Allyl chloride                   | 8.16±1.98  | 9.40±2.00   | 20.00±3.34   | 3.11±0.41  | 9.16±0.39    | 5.33±0.72  | 7.41±1.63  | 806/814   | MS, RI, S |
| Isothiazole                      | -          | -           | 1.00±0.06    | 1.00±0.04  | -            | -          | -          | 1214/N    | MS        |
| N-Allylacetamide                 | -          | -           | -            | -          | 5.46±0.91    | -          | -          | 1761/N    | MS        |
| Hexanoic acid                    | -          | 1.71±0.01   | -            | 3.41±0.06  | -            | -          | 3.30±0.26  | 1850/1850 | MS, RI, S |
| 3-Methylphenol                   | -          | -           | 0.86±0.00    | -          | -            | -          | -          | 2087/2085 | MS, RI, S |
| Dehydroacetic acid               | -          | -           | -            | -          | -            | 31.90±0.80 | -          | 2374/N    | MS        |
| <b>Total</b>                     | 3430.83    | 3389.06     | 4491.3       | 3644.9     | 8628.4       | 6048.87    | 4901.67    |           |           |

<sup>a</sup> "-": Not detected; <sup>b</sup> RI: retention index on a DB-WAX column, RI\*: retention index in literature; <sup>c</sup> "N": retention index was not found in the literature; <sup>d</sup> "MS" means qualitative by mass spectrometry, "RI" means qualitative by retention index, and "S" means qualitative by the standard.

**Table S2.** Odor activity values of volatiles in seven samples.

| Compounds                           | OT (µg/g) <sup>a</sup> | Odor description                                | OAV <sup>b</sup> |       |                |       |        |       |       |
|-------------------------------------|------------------------|-------------------------------------------------|------------------|-------|----------------|-------|--------|-------|-------|
|                                     |                        |                                                 | MP 1             | MP 2  | MP 3           | MP 4  | MP 5   | MP 6  | MP 7  |
| sec-Butylisothiocyanate             | 0.09                   | Green                                           | 37               | 49    | - <sup>c</sup> | 92    | 36     | -     | -     |
| Allyl isothiocyanate                | 0.049                  | Pungent mustard, horseradish                    | 52266            | 50948 | 69494          | 51844 | 132555 | 96624 | 79495 |
| 3-Butenyl isothiocyanate            | 0.017                  | /                                               | 319              | 317   | -              | 17846 | -      | 374   | -     |
| Diglycolmonoethylether acetate      | 0.19                   | /                                               | 11               | 12    | 32             | -     | -      | -     | -     |
| 3-(Methylthio)propyl isothiocyanate | 0.65                   | Earthy, vegetable, sulfurous, horseradish       | -                | 2     | -              | 4     | -      | -     | -     |
| Benzyl isothiocyanate               | 0.035                  | Dusty, medicinal, horseradish, oily             | 56               | 63    | 35             | 77    | 46     | 37    | -     |
| Phenylethyl isothiocyanate          | 0.24                   | Green, horseradish, gooseberry, watercress      | 410              | 778   | 361            | 950   | 219    | 299   | 34    |
| Allyl mercaptan                     | 0.018                  | Alliaceous, sulfurous, garlic, onion, roasted   | 82               | 185   | 131            | -     | -      | -     | -     |
| Diallyl sulfide                     | 0.1                    | Sulfurous, onion, garlic, horseradish, metallic | -                | 11    | 14             | -     | 88     | 60    | 19    |
| Diallyl disulphide                  | 0.03                   | Alliaceous, onion, garlic, metallic             | -                | -     | -              | -     | 78     | -     | -     |
| Benzenepropanenitrile               | 0.015                  | Powerful nasturtium                             | 5772             | 745   | 1461           | 773   | 149    | 95    | 1473  |
| Carbon disulfide                    | 0.005                  | /                                               | 5644             | 28680 | 27382          | 3274  | 36912  | 17786 | 7884  |
| Allyl chloride                      | 18.6                   | /                                               | <1               | <1    | 1              | <1    | <1     | <1    | <1    |
| Hexanoic acid                       | 3                      | Sour, fatty, sweat, cheese                      | -                | <1    | -              | 1     | -      | -     | 1     |
| 3-Methylphenol                      | 0.015                  | Medicinal, woody, leather, phenolic             | -                | -     | 57             | -     | -      | -     | -     |

<sup>a</sup> Odor detection threshold in water according to reference Gemert, L. J. (2011); <sup>b</sup> OAV is the ratio of the concentration to threshold; <sup>c</sup> "-": Not detected.
